# Supplementary material
Source: Springer Nature journal article supplement (https://www.springermedizin.de/resource/supplementary/13058_2013_3562_MOESM4_ESM.pdf/9704164)
Supplement: MOESM4 [file 9704164]

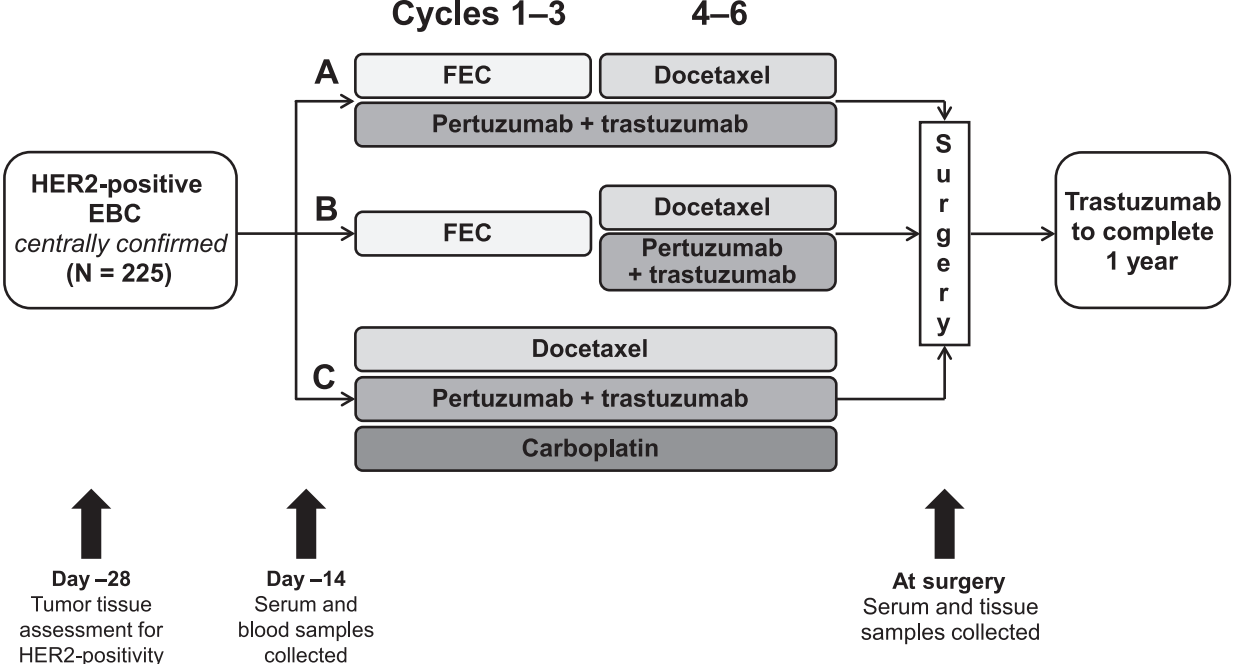

**Study dosing q3w:**

- **Pertuzumab:** 840 mg loading dose, 420 mg maintenance
- **Trastuzumab:** Neoadjuvant, 8 mg/kg loading dose, 6 mg/kg maintenance  
Adjuvant, 6 mg/kg maintenance until completion of 1 yr of treatment
- **FEC:** 500 mg/m<sup>2</sup>, 100 mg/m<sup>2</sup>, 600 mg/m<sup>2</sup>
- **Docetaxel:** 75 mg/m<sup>2</sup> (escalating to 100 mg/m<sup>2</sup> if tolerated, in Arms A and B only)
- **Carboplatin:** AUC 6
